# Supplementary material for: Sexuality in Patients with Hidradenitis Suppurativa: Beliefs, Behaviors and Needs
Source: PubMed Central journal article supplement (PMC7730576; doi:10.3390/ijerph17238808), 2020-11-27
Supplement: ijerph-17-08808-s001.pdf [file ijerph-17-08808-s001.pdf]

## CUESTIONARIO PARA PACIENTES

### 1. CARACTERÍSTICAS GENERALES

Año de nacimiento: \_\_\_\_\_

Sexo:  Mujer  Varón

País de residencia:  España  Otro (por favor, indíquelo): \_\_\_\_\_

Nivel de estudios:  Básico  Secundario  Superior

¿Cuánto pesa? (indique su peso en Kg): \_\_\_\_\_

¿Cuánto mide? (indique su altura en cm): \_\_\_\_\_

Indique si fuma actualmente:  Sí  No

¿Toma alguna medicación de forma habitual? Por favor, indíquela (por ejemplo, enalapril, simvastatina...): \_\_\_\_\_

¿Qué edad tenía cuando comenzó la hidradenitis supurativa?: \_\_\_\_\_

¿Cuántos años hace que recibe atención médica para la hidradenitis supurativa?: \_\_\_\_\_

¿Cuántos años tardaron en diagnosticarle la hidradenitis supurativa?: \_\_\_\_\_

En el último mes, ¿en qué zonas de su cuerpo tiene o ha tenido LESIONES ACTIVAS o CICATRICES? Por favor, marque las casillas que correspondan:

|                 | LESIONES ACTIVAS | CICATRICES |
|-----------------|------------------|------------|
| Axilas          |                  |            |
| Inglés          |                  |            |
| Genitales       |                  |            |
| Glúteos         |                  |            |
| Región mamaria  |                  |            |
| Abdomen         |                  |            |
| Región perianal |                  |            |
| Cuello          |                  |            |

Piense un momento en la zona de su cuerpo más afectada por la hidradenitis supurativa. ¿A cuál de estas tres imágenes se parece más? Por favor, indíquela (marque solo una respuesta):

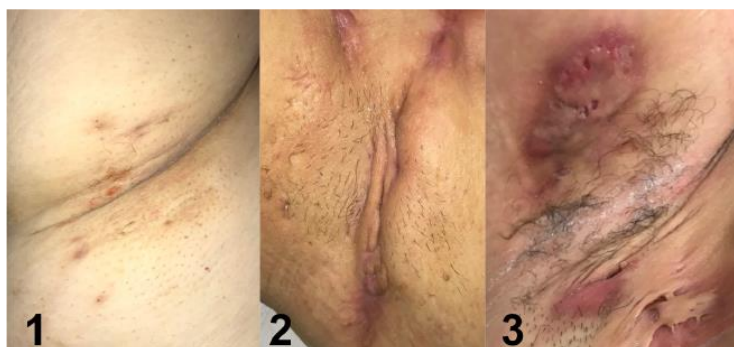

1  2  3



## 2. DIFICULTADES PERCIBIDAS EN LA ACTIVIDAD SEXUAL

**¿Cómo dificulta la hidradenitis supurativa su vida sexual?** Puede marcar más de una respuesta

- Hace que tenga miedo al rechazo o a la reacción de mi pareja sexual
- Dificulta mis relaciones sexuales por el dolor
- Dificulta mis relaciones sexuales por la supuración
- Dificulta mis relaciones sexuales por el mal olor
- El tratamiento de la hidradenitis supurativa dificulta mis relaciones sexuales
- Ninguna de las anteriores

**¿Le gustaría compartir sus problemas sexuales con personal sanitario?** Puede marcar más de una respuesta

- No
- Sí, con mi médico de familia
- Sí, con mi dermatólogo
- Sí, con personal de enfermería
- Sí, con un psicólogo/sexólogo

## 3. ATRACTIVO PERCIBIDO

**¿Se considera atractivo/a sexualmente?** Marque solo una respuesta

- Nada
- Un poco
- Lo normal
- Bastante
- Mucho

## 4. ORIENTACIÓN SEXUAL

**¿Por quién siente atracción sexual?** Marque solo una respuesta

- Los hombres
- Las mujeres
- Los hombres y las mujeres

**¿Tiene pareja estable?**

- Sí (pasa automáticamente al apartado 5)
- No (pasa automáticamente al apartado 6)

**5. SEXUALIDAD EN PACIENTES CON PAREJA ESTABLE**

**Su pareja estable:** (puede marcar más de una respuesta)

- Te ayuda a vencer el miedo al rechazo
- Te apoya
- Te ayuda con las curas en tus zonas íntimas
- Ninguna de las anteriores

**¿Cree que la hidradenitis supurativa influye negativamente sobre su relación de pareja?**

Marque solo una respuesta

- Nada
- Un poco
- Bastante
- Mucho

**6. SEXUALIDAD EN PACIENTES SOLTEROS**

**¿Cómo se siente al conocer a alguien con quien podría tener una relación de pareja o relaciones sexuales?** Puede marcar más de una respuesta

- Me siento bien, ilusionado/a
- Tengo miedo al rechazo y a la reacción de la otra persona por la hidradenitis supurativa
- Prefiero no conocer a nadie a causa de la hidradenitis supurativa
- Prefiero no conocer a nadie por otros motivos

**¿Cree que la hidradenitis supurativa influye negativamente sobre sus posibilidades de tener una relación de pareja o relaciones sexuales?** Marque solo una respuesta

- Nada
- Un poco
- Bastante
- Mucho

## CUESTIONARIO PARA CONTROLES SANOS

**Año de nacimiento:** \_\_\_\_\_

**Sexo:**  Mujer  Varón

**País de residencia:**  España  Otro (por favor, indíquelo): \_\_\_\_\_

**Nivel de estudios:**  Básico  Secundario  Superior

**¿Cuánto pesa?** (indique su peso en Kg): \_\_\_\_\_

**¿Cuánto mide?** (indique su altura en cm): \_\_\_\_\_

**Indique si fuma actualmente:**  Sí  No

**¿Toma alguna medicación de forma habitual?** Por favor, indíquela (por ejemplo, enalapril, simvastatina...): \_\_\_\_\_

**¿Se considera atractivo/a sexualmente?** Marque solo una respuesta

- Nada
- Un poco
- Lo normal
- Bastante
- Mucho

**¿Por quién siente atracción sexual?** Marque solo una respuesta

- Los hombres
- Las mujeres
- Los hombres y las mujeres

**¿Alguna vez ha sentido miedo al rechazo de su pareja sexual/sentimental?**

- No
- Sí

**En caso de que alguna vez haya sentido miedo al rechazo, indique el/los motivo(s):** Puede marcar más de una respuesta (pregunta disponible solamente para personas que respondieran "sí" al ítem anterior):

- Por mi apariencia física
- Por inseguridad
- Por problemas emocionales (como ansiedad, depresión...)
- Por un problema de salud
- Por otros motivos

**Si tuviera problemas sexuales, ¿le gustaría compartirlos con personal sanitario?** Puede marcar más de una respuesta

- No
- Sí, con mi médico de familia
- Sí, con personal de enfermería
- Sí, con un psicólogo/sexólogo

**¿Tiene pareja estable?**

- Sí
- No

**¿Cómo se siente al conocer a alguien con quien podría tener una relación de pareja o relaciones sexuales?** (pregunta disponible solamente para personas que respondieran “no” en el ítem anterior)

- Me siento bien, ilusionado/a
- Tengo miedo al rechazo y a la reacción de la otra persona por algún motivo

# QUESTIONNAIRE FOR PATIENTS

## 1. BASELINE CHARACTERISTICS

Birth year: \_\_\_\_\_

Sex: Female Male

Residence country: Spain Abroad (please, indicate): \_\_\_\_\_

Educational status: Basic Medium Superior

How much do you weigh? (indicate your weight in Kg): \_\_\_\_\_

How tall are you? (indicate your height in cm): \_\_\_\_\_

Indicate if you currently smoke: Yes No

Do you take any medication on a regular basis? Please indicate it (e.g. enalapril, simvastatin...): \_\_\_\_\_

How old were you when hidradenitis suppurativa started? \_\_\_\_\_

How many years have you been receiving medical attention for hidradenitis suppurativa?  
\_\_\_\_\_

How many years did it take for you to be diagnosed with hidradenitis suppurativa? \_\_\_\_\_

In the last month, in what areas of your body do you have or have you had ACTIVE LESIONS or SCARS? Please check the boxes that apply:

|                 | ACTIVE LESIONS | SCARS |
|-----------------|----------------|-------|
| Axilla          |                |       |
| Groin           |                |       |
| Genitals        |                |       |
| Buttocks        |                |       |
| Breast          |                |       |
| Abdomen         |                |       |
| Perianal region |                |       |
| Neck            |                |       |

Think for a moment about the area of your body most affected by hidradenitis suppurativa. Which of these three images does it look most like? Please indicate it (check only one answer):

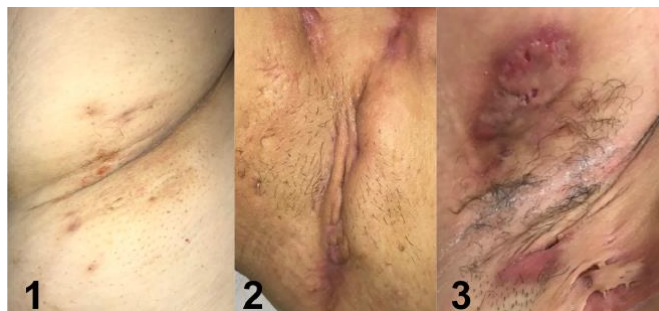

1 2 3





## 2. PERCEIVED DIFFICULTIES IN SEXUAL ACTIVITY

**How does hidradenitis suppurativa affect you sexual relations?** You can check more than one answer

- I experience fear of rejection or of the reaction of my sexual partner
- Pain interferes with my sexual relations
- Suppuration interferes with my sexual relations
- Odor interferes with my sexual relations
- Treatment interferes with my sexual relations
- None of the above

**Would you like to share your sexual problems with healthcare staff?** You can check more than one answer

- No
- Yes, with my GP
- Yes, with my dermatologist
- Yes, with nursing staff
- Yes, with a psychologist/sexologist

## 3. PERCEIVED ATTRACTIVENESS

**Do you consider yourself sexually attractive?** Check only one answer

- Not at all
- Less than average
- Average
- More than average
- Very attractive

## 4. SEXUAL PREFERENCES

**Who are you sexually attracted to?** Check only one answer

- Men
- Women
- Both men and women

**Are you in a stable relationship?**

- Yes (automatically goes to section 5)
- No (automatically goes to section 6)

**5. SEXUALITY IN PATIENTS WITH HIDRADENITIS SUPPURATIVA IN STABLE RELATIONSHIP**

**Your partner:** (you can check more than one answer)

- Helps you overcome the fear of rejection
- Supports you
- Helps with lesion dressing in intimate areas
- None of the above

**Do you think that hidradenitis suppurativa negatively influences your relationship?** Check only one answer

- Not at all
- A little
- Somewhat
- Very much

**6. SEXUALITY IN SINGLE PATIENTS WITH HIDRADENITIS SUPPURATIVA**

**How do you feel when you meet someone you could have a relationship or sexual relations with?** You can check more than one answer

- I feel good, excited
- I am afraid of rejection and the reaction of the other person because of hidradenitis suppurativa
- I prefer not to meet anyone because of hidradenitis suppurativa
- I prefer not to meet anyone for other reasons

**Do you think that HS negatively influences your chances of having a relationship or sexual relations?** Check only one answer

- Not at all
- A little
- Somewhat
- Very much

## QUESTIONNAIRE FOR CONTROLS

**Birth year:** \_\_\_\_\_

**Sex:** Female Male

**Residence country:** Spain Abroad (please, indicate): \_\_\_\_\_

**Educational status:** Basic Medium Superior

**How much do you weigh?** (indicate your weight in Kg): \_\_\_\_\_

**How tall are you?** (indicate your height in cm): \_\_\_\_\_

**Indicate if you currently smoke:** Yes No

**Do you take any medication on a regular basis?** Please indicate it (e.g. enalapril, simvastatin...): \_\_\_\_\_

**Do you consider yourself sexually attractive?** Check only one answer

Not at all

Less than average

Average

More than average

Very attractive

**Who are you sexually attracted to?** Check only one answer

Men

Women

Both men and women

**Have you ever felt fear of rejection of your sexual partner?**

No

Yes

**If you have ever felt fear of rejection, please indicate the reason(s):** You can check more than one answer (question available for people who answered "yes" to the previous item)

Because of my physical appearance

Because of insecurity

Because of emotional problems (such as anxiety, depression...)

Because of a health problem

For other reasons

**If you had sexual problems, would you like to share them with healthcare staff?** You can check more than one answer

- No
- Yes, with my GP
- Yes, with nursing staff
- Yes, with a psychologist/sexologist

**Are you in a stable relationship?**

- Yes
- No

**How do you feel when you meet someone you could have a relationship or sexual relations with?** (question available for people who answered “no” to the previous item)

- I feel good, excited
- I am afraid of rejection and the reaction of the other person for whatever reason
